# Supplementary material for: Cathepsin B-Cleavable Polymeric Photosensitizer Prodrug for Selective Photodynamic Therapy: In Vitro Studies
Source: MDPI journal article supplement (doi:10.3390/ph15050564), 2022-04-30
Supplement: s1 [file s1]

Article

# Cathepsin B cleavable-polymeric photosensitizer prodrug for selective photodynamic therapy: *In Vitro* Studies

Manish Jain <sup>1,5</sup>, Jordan Bouilloux <sup>2</sup>, Ines Borrego <sup>1</sup>, Stéphane Cook <sup>1,6</sup>, Hubert van den Bergh <sup>3</sup>, Norbert Lange <sup>2</sup>, Georges Wagnieres <sup>4</sup>, Marie-Noelle Giraud <sup>1\*</sup>

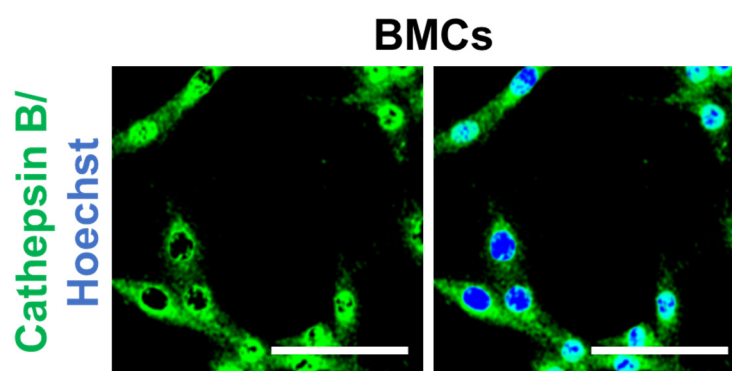

**Supplementary Figure S1: Expression of Cathepsin B in BMCs.** Representative images showing immunostaining for Cathepsin B (red) in BMCs isolated from rat bone marrow. Nuclei are counterstained with Hoechst (blue). Scale bars: 100  $\mu\text{m}$ .

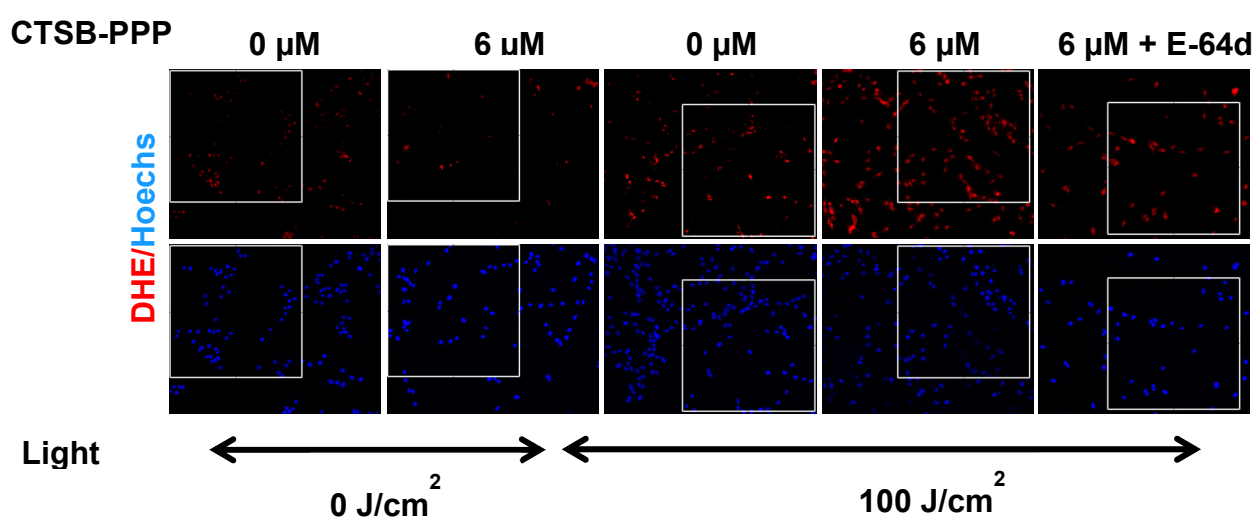

**Supplementary Figure S2. (A) Original** fluorescent photomicrograph of DHE (red; Up-per panel and Hoechst staining (blue; bottom panel)

Supplementary Table S1- Related analysis for Figure 3A

| Time         | 0 Min    | 10 Min   | 20 Min   | 60 Min   | 24 h     |
|--------------|----------|----------|----------|----------|----------|
| CTSB-PPP     | 304.876  | 1453.019 | 2100.603 | 3153.928 | 2762.526 |
| Fluorescence | 234.5927 | 2444.654 | 2466.619 | 3460.447 | 3281.686 |
| Intensity    | 295.0668 | 1899.411 | 2064.937 | 4140.803 | 3090.593 |

Supplementary Table S2- Related analysis for Figure 4B

| Time                                | 0 Min    | 10 Min   | 20 Min   | 60 Min | 24 h     |
|-------------------------------------|----------|----------|----------|--------|----------|
| CTSB-PPP 6 $\mu$ M                  | 3053.079 | 85468.01 | 78170.87 | 184230 | 44379.67 |
| Light Dose (100 J/cm <sup>2</sup> ) | 46756.5  | 22664.46 | 17795.49 | 182681 | 90766.75 |
| E-64d (50 $\mu$ M)                  | 17301.85 | 24167.12 | 42616.14 | 240514 | 124910.3 |

Supplementary Table S3- Related analysis for Figure 7

| CTSB-PPP 0 $\mu$ M | CTSB-PPP 3 $\mu$ M | CTSB-PPP 6 $\mu$ M | CTSB-PPP 12 $\mu$ M | CTSB-PPP 24 $\mu$ M | CTSB-PPP 48 $\mu$ M | CTSB-PPP 6 $\mu$ M + E-64d (50 $\mu$ M) | CTSB-PPP 12 $\mu$ M + E-64d (50 $\mu$ M) |
|--------------------|--------------------|--------------------|---------------------|---------------------|---------------------|-----------------------------------------|------------------------------------------|
| 304.876            | 1352.165           | 4187.510           | 1713.500            | 4286.285            | 2987.563            | 6707.696                                | 7909.174                                 |
| 234.593            | 1326.665           | 3557.992           | 2518.688            | 3855.739            | 2865.938            | 7849.319                                | 7992.087                                 |
| 295.067            | 951.514            | 4162.107           | 2727.938            | 5447.929            | 3201.813            | 5965.570                                | 5803.124                                 |
|                    |                    | 4787.583           | 2544.125            | 5745.100            | 2165.125            |                                         |                                          |
|                    |                    |                    | 1064.313            |                     | 2964.375            |                                         |                                          |
